# Supplementary material for: Sculptured thin film vanadium dioxide thermochromic coatings grown by oblique angle deposition: investigation of transmittance response and modulation enhancement by experiment and theoretical modeling
Source: Royal Society of Chemistry journal article supplement (doi:10.1039/d1tc02649f), 2021-01-01
Supplement: d1tc02649f1.pdf [file d1tc02649f1.pdf]

## Supporting Information

### **Sculptured Thin Film Vanadium dioxide Thermo-chromic Coatings Grown by Oblique Angle Deposition: Investigation of Transmittance Response and Modulation Enhancement by Experiment and Theoretical Modeling**

*Saranya Bhupathi,<sup>a,b</sup> Mohammad Abutoama,<sup>c</sup> Yi Long,<sup>a,b\*</sup> Ibrahim Abdulhalim<sup>a,b,c\*</sup>*

<sup>a</sup> School of Materials Science and Engineering, Nanyang Technological University, 50 Nanyang Avenue, 639798, Singapore.

<sup>b</sup> Singapore-HUJ Alliance for Research and Enterprise (SHARE), Nanomaterials for Energy and Energy-Water Nexus (NEW), Campus for Research Excellence and Technological Enterprise (CREATE), 138602, Singapore.

<sup>c</sup> Department of Electro-optics and Photonics Engineering, School of Electrical and Computer Engineering, Ben-Gurion University of the Negev, Beer Sheva, 84105, Israel.

\* Authors for correspondence. E-mail: [abdulhlm@bgu.ac.il](mailto:abdulhlm@bgu.ac.il) and E-mail: [longyi@ntu.edu.sg](mailto:longyi@ntu.edu.sg)

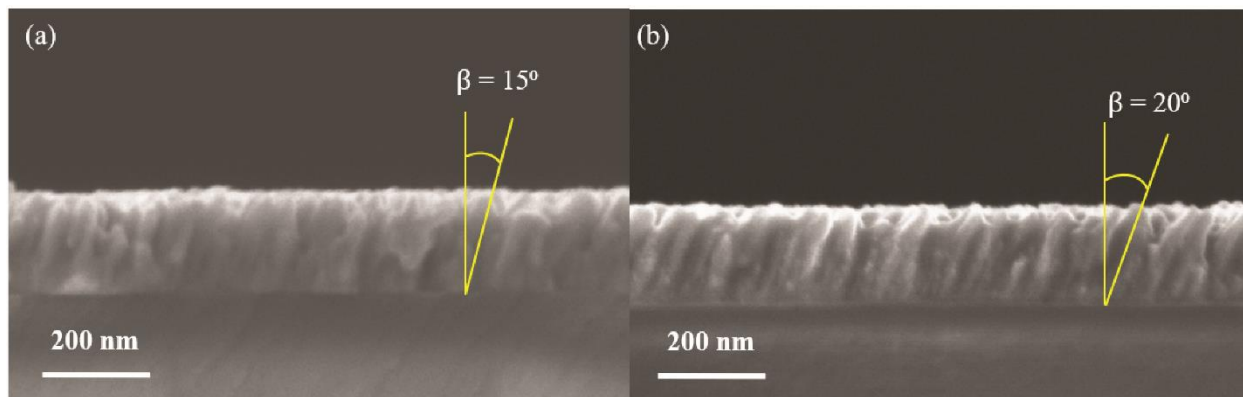

**Fig. S1** SEM cross-section images of the as-prepared STF vanadium at the deposition angles (a)  $\alpha = 70^\circ$  and (b)  $\alpha = 80^\circ$ .

**Table S1.** Summary of the AFM average roughness of as-prepared STF vanadium and STF VO<sub>2</sub> annealed at different temperatures and times

| Sample code | Annealing               | Annealing temperature (°C) | Annealing time (min) | Average roughness (nm) |
|-------------|-------------------------|----------------------------|----------------------|------------------------|
| T1          | No (as-prepared sample) | -                          | -                    | 2.5                    |
| T2          | Yes                     | 400                        | 2                    | 5.8                    |
| T3          | Yes                     | 450                        | 2                    | 9.5                    |
| T4          | Yes                     | 500                        | 2                    | 10.3                   |
| T5          | Yes                     | 450                        | 4                    | 8.8                    |
| T6          | Yes                     | 450                        | 6                    | 9.8                    |
| T7          | Yes                     | 450                        | 8                    | 10.0                   |
| T8          | Yes                     | 450                        | 10                   | 9.8                    |

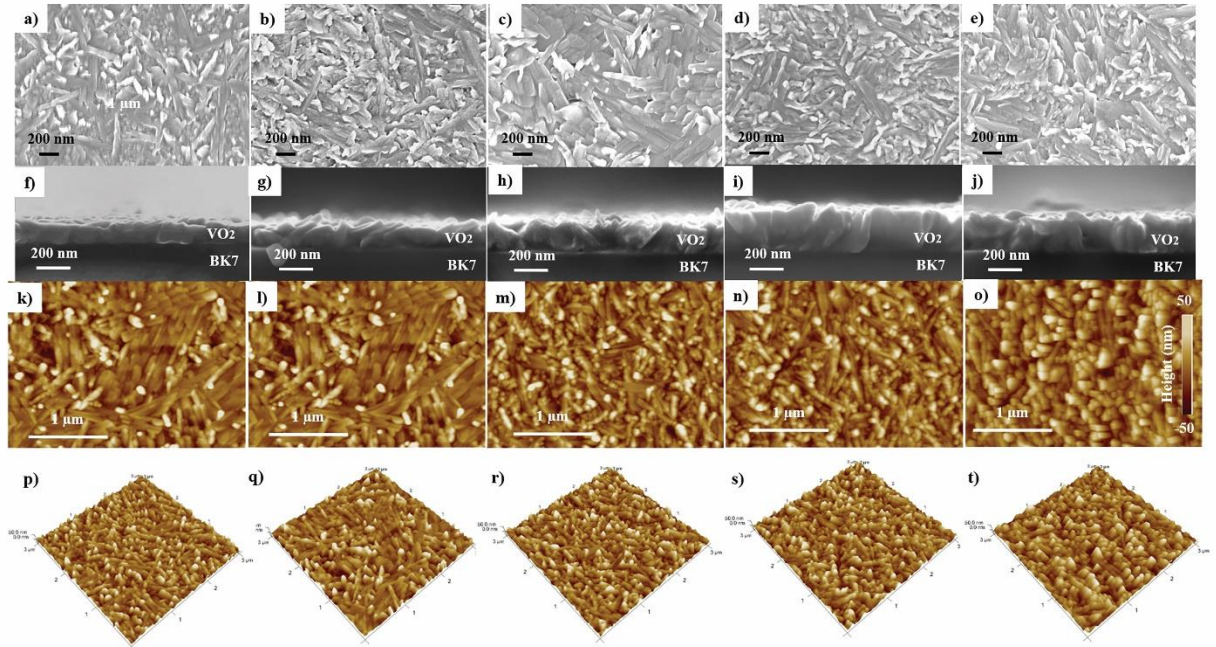

**Fig. S2** SEM top-view images of the samples (a) T3 (b) T5 (c) T6 (d) T7 and (e) T8. SEM cross-section images of the samples (f) T3 (g) T5 (h) T6 (i) T7 and (j) T8. AFM 2D pictures of the samples (k) T3 (l) T5 (m) T6 (n) T7 and (o) T8. AFM 3D pictures of the samples (p) T3 (q) T5 (r) T6 (s) T7 and (t) T8. T3, T5, T6, T7, and T8 are the heat-treated samples having different annealing times maintaining a constant annealing temperature. The oxidation annealing times of the samples T3, T5, T6, T7, and T8 are 2, 4, 6, 8, and 10 min respectively, with a constant annealing temperature of 450 °C in the ambient air.

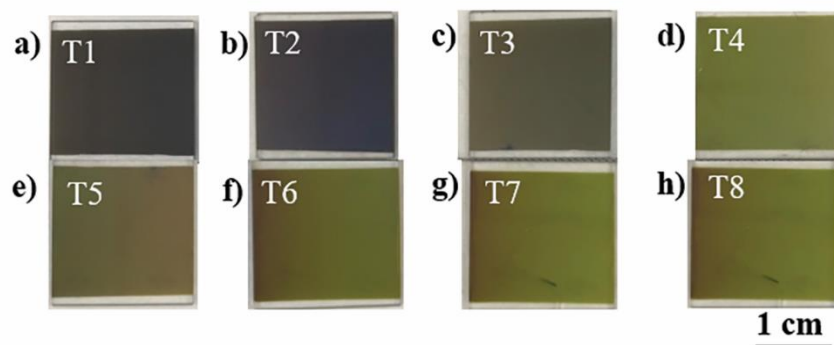

**Fig. S3** Photograph of the samples (a) T1 (b) T2 (c) T3 (d) T4 (e) T5 (f) T6 (g) T7 and (h) T8. The sample T1 corresponds to as-prepared STF vanadium, whereas the samples T2 to T8 are the samples subjected to different heat-treatments having different annealing temperatures and times. The oxidation annealing temperatures of the samples T2, T3, and T4 are 400, 450, and 500 °C respectively, with a constant annealing time of 2 min in the ambient air. The oxidation annealing times of the samples T5, T6, T7 and T8 are 4, 6, 8 and 10 min respectively, with a constant annealing temperature of 450 °C in the ambient air. It is known that  $\text{VO}_2$  is sensitive to air and prone to degradation when exposed to ambient air.<sup>1,2,3</sup> The color variation on the sample surface could be due to the presence of different oxides of vanadium<sup>4</sup> as a result of surface oxidation, after prolonged exposure of samples in the ambient air for various characterizations. A thickness variation of 8 to 12% is noticed at the sample edges that happens when the substrate is placed at an oblique angle for the deposition. The color changes particularly at the edges could also be due to the thickness variation in the sample edges.

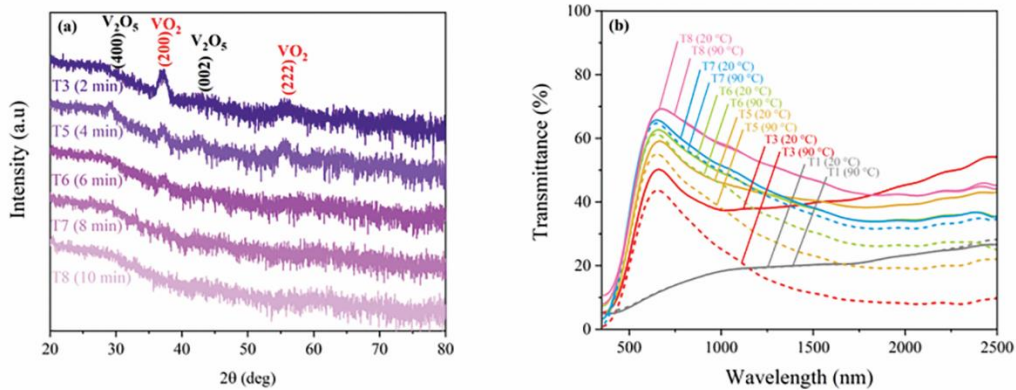

**Fig. S4** (a) GIXRD patterns corresponding to the samples T3, T5, T6, T7, and T8 for  $2\theta$  ranging from 20 to 80 degrees. (b) Transmittance responses of the samples T1, T3, T5, T6, T7, and T8 under unpolarized light at the measurement temperatures 20 and 90 °C. The sample T1 corresponds to as-prepared STF vanadium, whereas T3, T5, T6, T7, and T8 are the samples subjected to different heat treatments. The oxidation annealing times of the samples T3, T5, T6, T7, and T8 are 2, 4, 6, 8, and 10 min respectively, with a constant annealing temperature of 450 °C in the ambient air.

**Table S2.** Comparison of the thermochromic performance of VO<sub>2</sub> thin films (grown by various techniques, different substrates, and thicknesses) with the present work

| Sample                          | Substrate                  | Fabrication method  | Thickness | Deposition configuration | T <sub>lum(avg)</sub> (%) | ΔT <sub>ir(2000 nm)</sub> (%) | ΔT <sub>sol</sub> (%) |
|---------------------------------|----------------------------|---------------------|-----------|--------------------------|---------------------------|-------------------------------|-----------------------|
| VO <sub>2</sub> single layer    | Quartz <sup>5</sup>        | PVD                 | 130 nm    | normal                   | 39.7                      | 45.1                          | 10.2                  |
|                                 | BK7 <sup>6</sup>           | DC sputtering       | 90 nm     | normal                   | 35.4                      |                               | 9.7                   |
|                                 | BK7 <sup>7</sup>           | Reactive sputtering | 50 nm     | normal                   | 37.3                      | 44.4                          | 6.1                   |
|                                 | Soda-lime <sup>8</sup>     | HiPIMS              | 95 nm     | normal                   | 24.4                      |                               | 8.8                   |
|                                 | HT glass <sup>8</sup>      | HiPIMS              | 95 nm     | normal                   | 22.0                      |                               | 10.6                  |
|                                 | Quartz <sup>8</sup>        | HiPIMS              | 95 nm     | normal                   | 19.3                      |                               | 12.2                  |
|                                 | Soda-lime <sup>9</sup>     | HiPIMS              | 88 nm     | normal                   | 30.5                      | 37.0                          | 4.0                   |
|                                 | Fused Quartz <sup>10</sup> | Sol-gel             | 65 nm     | normal                   | 68.2                      | 30.0                          | 4.6                   |
|                                 | Float glass <sup>11</sup>  | RF sputtering       | 120 nm    | normal                   | 24.8                      | 25.6                          | 4.6                   |
|                                 | Fused silica <sup>11</sup> | RF sputtering       | 90 nm     | normal                   | 37.7                      | 27.7                          | 4.0                   |
|                                 | Glass <sup>12</sup>        | Reactive sputtering | 100 nm    | normal                   | 41.5                      |                               | 6.9                   |
| Glass <sup>13</sup>             | CVD                        | 300 nm              | normal    | 15.4                     |                           | 3.1                           |                       |
| STF VO <sub>2</sub> (This work) | BK7                        | RF sputtering       | 130 nm    | oblique angle (α = 85°)  | 41.2                      | 37.3                          | 8.9                   |

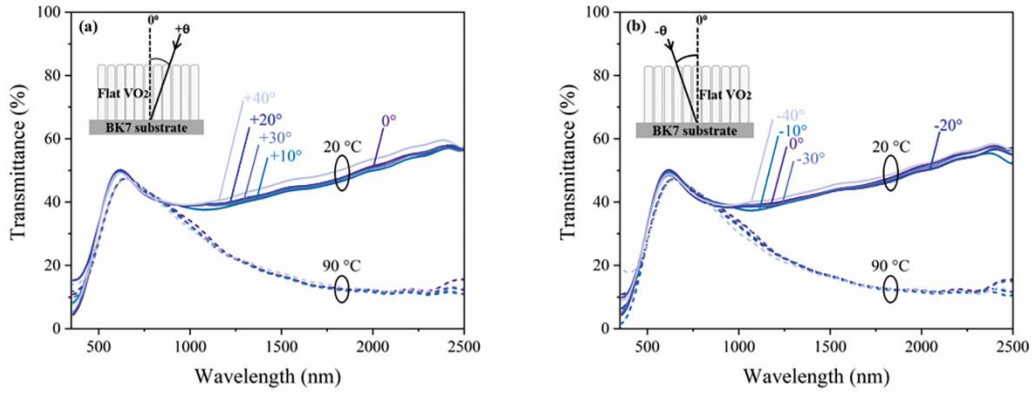

**Fig. S5** Angular transmittance responses of flat VO<sub>2</sub> under unpolarized light at the measurement temperatures 20 and 90 °C (a) for the positive angles of incidence from +10° to +40° and (b) for the negative angles of incidence from -10° to -40° (in steps of 10°) with respect to 0°, where 0° is the measurement in the normal incidence. The insets in (a) and (b) are the schematics of the transmittance measurements for the positive and negative angles of incidence respectively in flat VO<sub>2</sub> with straight nanocolumns. The dotted lines in the inset indicate the substrate normal, and the arrow indicates the light ray.

**Table S3.** Comparison of thermochromic performance of recent work on STF VO<sub>2</sub> (transmittance measured in normal and oblique incidence) with the present work

| Sample                          | Substrate         | Fabrication method  | Thickness | Deposition configuration              | Tilt angle ( $\beta$ ) | Light incidence angle | $T_{lum}(avg)$ (%) | $\Delta T_{nir}$ (%) | $\Delta T_{sol}$ (%) |
|---------------------------------|-------------------|---------------------|-----------|---------------------------------------|------------------------|-----------------------|--------------------|----------------------|----------------------|
| STF VO <sub>2</sub> (This work) | BK7               | RF sputtering       | 130 nm    | oblique angle ( $\alpha = 85^\circ$ ) | 20°                    | 0°                    | 41.2               | 7.0                  | 8.9                  |
|                                 |                   |                     |           |                                       |                        | +30°                  | 40.8               | 7.2                  | 9.6                  |
|                                 |                   |                     |           |                                       |                        | -30°                  | 39.3               | 6.5                  | 8.4                  |
| STF VO <sub>2</sub>             | BK7 <sup>14</sup> | Thermal evaporation | ≈500 nm   | oblique angle ( $\alpha = 85^\circ$ ) | 47°                    | 0°                    | 33.8               |                      | 6.4                  |
|                                 |                   |                     |           |                                       |                        | +30°                  | 32.4               |                      | 7.0                  |
|                                 |                   |                     |           |                                       |                        | -30°                  | 34.4               |                      | 6.1                  |

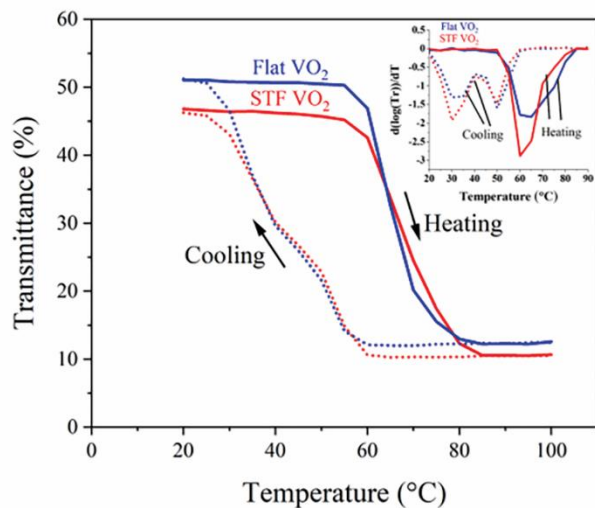

**Fig. S6** Transmittance hysteresis loop of STF VO<sub>2</sub> and flat VO<sub>2</sub> at the wavelength of 2000 nm. The black arrows indicate heating and cooling directions. The inset shows the transmittance derivative curves of STF VO<sub>2</sub> and flat VO<sub>2</sub> versus the measurement temperature.

**Table S4.** Summary of thermal hysteresis characteristics of STF VO<sub>2</sub> and flat VO<sub>2</sub>

| Sample               | <b>T<sub>c</sub> in heating and cooling branches (°C)</b> |                               | <b>T<sub>c</sub> (°C)</b> | <b>ΔT<sub>c</sub> (°C)</b> |
|----------------------|-----------------------------------------------------------|-------------------------------|---------------------------|----------------------------|
|                      | <b>T<sub>c</sub>(heating)</b>                             | <b>T<sub>c</sub>(cooling)</b> |                           |                            |
| STF VO <sub>2</sub>  | 65                                                        | 30/50                         | 47.5/57.5                 | 35/15                      |
| Flat VO <sub>2</sub> | 60                                                        | 30/50                         | 45/55                     | 30/10                      |



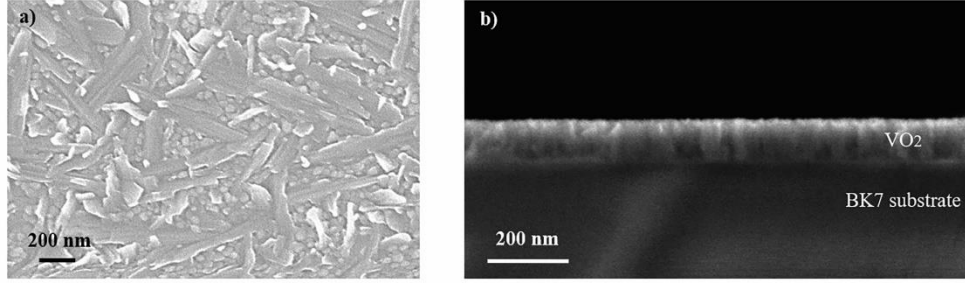

**Fig. S7** SEM (a) top-view and (b) cross-section images of flat VO<sub>2</sub> annealed at 450 °C for 2 min.

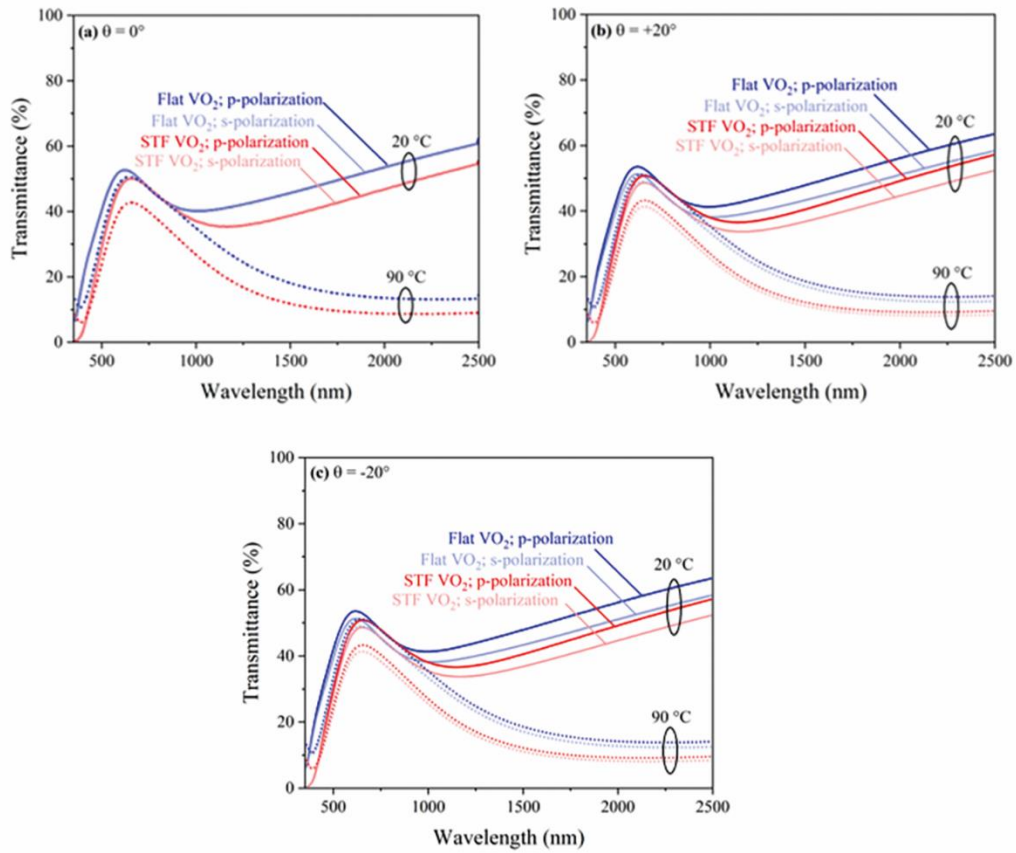

**Fig. S8** Polarization (*s* and *p*-polarizations) dependence of the transmittance spectra at both 20 and 90 °C for the flat and STF VO<sub>2</sub> samples at (a)  $\theta = 0^\circ$  (b)  $\theta = +20^\circ$  (c)  $\theta = -20^\circ$ . The thickness of both flat and STF VO<sub>2</sub> is 130 nm, while  $f_a$  of STF VO<sub>2</sub> is 89%.

## References

- [1] L. Chen, X. Wang, D. Wan, Y. Cui, B. Liu, S. Shi, H. Luo and Y. Gao, *RSC Adv.*, 2016, **6**, 73070.
- [2] T. Chang, X. Cao, N. Li, S. Long, Y. Zhu, J. Huang, H. Luo and P. Jin, *Matter*, 2019, **1**, 734–744.
- [3] X. Wang, Y. Cao, C. Yang, L. Yan and Y. Li, *J. Vac. Sci. Technol., A*, 2016, **A34**, 01A106.
- [4] Y. B. Kang, *J. Eur. Ceram. Soc.*, 2012, **32**, 3187–3198.
- [5] S. Bhupathi, S. Wang, M. Abutoama, I. Balin, L. Wang, P. G. Kazansky, Y. Long and I. Abdulhalim, *ACS Appl. Mater. Interfaces*, 2020, **12**, 41905–41918.
- [6] Y. Yang, X. Cao, G. Sun, S. Long, T. Chang, X. Li and P. Jin, *J. Alloys Compd.*, 2019, **791**, 648-654.
- [7] S. Long, H. Zhou, S. Bao, Y. Xin, X. Cao and P. Jin, *RSC Adv.*, 2016, **6**, 106435.
- [8] T. D. Vu, S. Liu, X. Zeng, C. Li and Y. Long, *Ceram. Int.*, 2020, **46**, 8145–8153.
- [9] J. Houska, D. Kolenaty, J. Vlcek and R. Cerstvy, *Thin Solid Films* 2018, **660**, 463–470.
- [10] C. Wang, L. Zhao, Z. Liang, B. Dong, L. Wan and S. Wang, *Sci. Technol. Adv. Mater.*, 2017, **18**, 563-573.
- [11] E. Gagaoudakis, E. Aperathitis, G. Michail, G. Kiriakidis and V. Binas, *Sol. Energy Mater. Sol. Cells*, 2021, **220**, 110845.
- [12] S. Long, X. Cao, Y. Wang, T. Chang, N. Li, L. Jin, L. Ma, F. Xu, G. Sun and P. Jin, *Sol. Energy Mater. Sol. Cells*, 2020, **209**, 110449.
- [13] M. J. Powell, R. Q.-Cabrera, A. Taylor, D. Teixeira, L. Papakonstantinou, R. G. Palgrave, G. Sankar and I. P. Parkin, *Chem. Mater.*, 2016, **28**, 1369-1376.
- [14] Y. Sun, X. Xiao, G. Xu, G. Dong, G. Chai, H. Zhang, P. Liu, H. Zhu and Y. Zhan, *Sci. Rep.*, 2013, **3**, 2756.
